# Supplementary material
Source: PubMed Central journal article supplement (PMC514135)
Supplement: plntphys_135_2_1008__1.pdf [file plntphys_135_2_1008__1.pdf]

**Supplemental Table III. T-DNA Mutant Screens, Genotyping and qPCR Primers**

| Primer           | Sequence                                                                                           | Used for                                                                       | Notes                                                                      |
|------------------|----------------------------------------------------------------------------------------------------|--------------------------------------------------------------------------------|----------------------------------------------------------------------------|
| 201<br>208       | 5' CAGCTAAGCATCCGATTTGC<br>5' TCACATAGAGAAGTCACATG                                                 | <i>RGA</i><br>genotyping                                                       | 0.8 kb PCR product                                                         |
| 244<br>LB        | 5' ATGGC(G/T)GA(G/T)GTTGCT(T/C)<br>(T/A)GAAACTCGA(A/G)CA<br>5' GGCAATCAGCTGTTGCCCGT<br>CTCACTGGTG  | <i>rga-28</i><br>genotyping                                                    | 0.5 kb PCR product                                                         |
| 214<br>243       | 5' ATGATCCATGGGACCTCTTCCGGCG<br>AGTTCTAA<br>5' CGTCGAGAGTTTCCAAGCGGAGGTG<br>GTAAT                  | confirming absence of<br><i>RGA</i> transcript in<br><i>rga-28</i> by RT-PCR   | 1.4 kb PCR product                                                         |
| 254<br>255       | 5' AGAAGCAATCCAGCAGA<br>5' GTGACTCTCTTCTTACCTC                                                     | <i>RGA</i><br>qPCR                                                             | 286 bp PCR product                                                         |
| 353<br>352       | 5' GGTTCCTGGTGATGGAATCTCGA<br>5' TTATTCCACACGATTGATTCGCCA                                          | <i>RGL1</i><br>genotyping                                                      | 1.5 kb PCR product                                                         |
| 355<br>RB        | 5' ATGGC(A/T)GA(A/T/C)GT(A/T/G)GCA<br>CA(G/C)AAG CTTGAACA<br>5' TGATAGTGACCTTAGGCGACT<br>TTTGAACGC | <i>rgl1-2</i><br>genotyping                                                    | 1.4 kb PCR product                                                         |
| 353<br>352       | see above                                                                                          | confirming absence of<br><i>RGL1</i> transcript in<br><i>rgl1-2</i> by RT-PCR  | 1.5 kb PCR product                                                         |
| 357<br>358       | 5' CATCAATGACGACGGT<br>5' GTACTCTGAGTCAGGCTT                                                       | <i>RGL1</i><br>qPCR                                                            | 260 bp PCR product                                                         |
| 360<br>361       | 5' TGCGGTACCATGAAGAGAGGAT<br>ACGGAG<br>5' ATCGGTACCGCCGCGACTCAGG                                   | <i>RGL2</i><br>genotyping                                                      | 1.5 kb PCR product                                                         |
| 355<br>LB        | see above                                                                                          | <i>rgl2-13</i><br>genotyping                                                   | 1 kb PCR product                                                           |
| 362<br>361       | 5' GTTCTACTGTCTTAAACGACTCTGTT<br>CATT<br>see above                                                 | confirming absence of<br><i>RGL2</i> transcript in<br><i>rgl2-13</i> by RT-PCR | 1.4 kb PCR product                                                         |
| 364<br>365       | 5' CAAAACCACTACCAGC<br>5' TCCACACAACCTCGGG                                                         | <i>RGL2</i> qPCR<br>(cDNA as a template)                                       | 326 bp PCR product                                                         |
| 366<br>367       | 5' ACCAAAACCACTACCAGC<br>5' GTCGTTTAAGACAGTAGAACCA                                                 | <i>RGL2</i> qRT-PCR<br>(RNA as a template)                                     | 220 bp PCR product                                                         |
| RGL2-3<br>RGL2-4 | 5' ACGCCATGGAGATGAAGAGAGGA<br>TACGGAGA<br>5' ACGCAGATCTCAGGCGAGTTTCCAC<br>GCCGA                    | Gal4 AD-RGL2                                                                   | 5' and 3' primers for<br>amplifying <i>RGL2</i> and cloning<br>into pACTII |
| 371<br>374       | 5' GTTACATACACATGTTCTCTCGT<br>TCTCGA<br>5' ATTGCCTCTTCTAGTAATGCCTTC<br>AATGAC                      | <i>RGL3</i><br>genotyping                                                      | 1.5 kb PCR product                                                         |
| 374<br>LB        | see above                                                                                          | <i>rgl3-3</i><br>genotyping                                                    | 0.3 kb PCR product                                                         |
| 374<br>373       | see above<br>5' ATCGGTACCTTTATGACGACGTATC<br>TAC                                                   | confirming absence of<br><i>RGL3</i> transcript in<br><i>rgl3-3</i> by RT-PCR  | 1.4 kb PCR product                                                         |
| 378<br>379       | 5' CAATGATATTGCCTCTTCTAG<br>5' CTGAGTCACACCAAGGA                                                   | <i>RGL3</i><br>qPCR                                                            | 224 bp PCR product                                                         |

|            |                                           |                                                                     |                                                                            |
|------------|-------------------------------------------|---------------------------------------------------------------------|----------------------------------------------------------------------------|
| 380        | 5' AACAGATCTCGATGAAACGAAG<br>CCATCAA      | Gal4 AD-RGL3                                                        | 5' and 3' primers for<br>amplifying <i>RGL3</i> and cloning<br>into pACTII |
| 381        | 5' AACTAGATCTTTATGACGACGTATC<br>TAC       |                                                                     |                                                                            |
| 305        | 5' CACACGACCGCTCATAG                      | <i>GAI</i><br>qPCR                                                  | 250 bp PCR product                                                         |
| 306        | 5' TGCCTATCCAATTTACCCTC                   |                                                                     |                                                                            |
| 5'GA4BamHI | 5'-CGCGGATCCGTGTTTAGAGGCCAT<br>CCCATTAC   | <i>GA3ox1</i> RT-PCR<br>(for checking genomic<br>DNA contamination) | genomic DNA: 1.6 kb PCR<br>product<br>cDNA: 1.1 kb PCR product             |
| 3'GA4SalI  | 5'-ACGCGTCGACCAAACAAATCATAT<br>TGCTGAAATC |                                                                     |                                                                            |
| ubq11-3Frt | 5' GCAGATTTTCGTAAAACC                     | <i>UBQ11</i> qPCR<br>(cDNA as a template)                           | 167 bp PCR product                                                         |
| ubq11-4Rrt | 5' CCAAAGTTCTGCCGTCC                      |                                                                     |                                                                            |
| ubq11Frt-2 | 5'-CTTGGTTCTCAGGCTCC                      | <i>UBQ11</i> qRT-PCR<br>(RNA as a template)                         | 232 bp PCR product                                                         |
| ubq11Rrt-2 | 5'-CAAATGAAGCGTAGACTCC                    |                                                                     |                                                                            |
| At18SFrt   | 5'-ATACGTGCAACAAACCC                      | <i>18S</i> rRNA<br>qRT-PCR                                          | 301 bp PCR product                                                         |
| At18SRrt   | 5'-CTACCTCCCCGTGTC                        |                                                                     |                                                                            |
